# Supplementary material
Source: PubMed Central journal article supplement (PMC2637306)
Supplement: NIHMS81483-supplement-2.pdf [file NIHMS81483-supplement-2.pdf]

## Supporting Information For:

### “Analytical Performance of Immobilized Pronase for Glycopeptide Footprinting and Implications for Surpassing Reductionist Glycoproteomics”

Eric D. Dodds, Richard R. Seipert, Brian H. Clowers,

J. Bruce German, and Carlito B. Lebrilla

**Supplementary Table 1.** N-linked glycopeptides derived from immobilized pronase digestion of CEA. The root mean square (RMS) mass error of the assignments was 1.8 parts per million (ppm). \*HexNAc: N-acetylhexosamine; Hex: hexose. †All mass errors are absolute values (*i.e.*, represented as non-negative).

| GP <i>m/z</i> | Peptide                           | Site             | Glycan*                              | Ion Type            | $\Delta m/z^\dagger$ |
|---------------|-----------------------------------|------------------|--------------------------------------|---------------------|----------------------|
| 1462.5683     | <sup>293</sup> NL <sup>294</sup>  | <sup>292</sup> N | HexNAc <sub>2</sub> Hex <sub>5</sub> | [M+H] <sup>+</sup>  | 0.0009               |
| 1484.5484     | <sup>293</sup> NL <sup>294</sup>  | <sup>292</sup> N | HexNAc <sub>2</sub> Hex <sub>5</sub> | [M+Na] <sup>+</sup> | 0.0007               |
| 1503.5981     | <sup>293</sup> NL <sup>294</sup>  | <sup>292</sup> N | HexNAc <sub>3</sub> Hex <sub>4</sub> | [M+H] <sup>+</sup>  | 0.0020               |
| 1563.6129     | <sup>293</sup> NLT <sup>295</sup> | <sup>292</sup> N | HexNAc <sub>2</sub> Hex <sub>5</sub> | [M+H] <sup>+</sup>  | 0.0010               |
| 1585.5947     | <sup>293</sup> NLT <sup>295</sup> | <sup>292</sup> N | HexNAc <sub>2</sub> Hex <sub>5</sub> | [M+Na] <sup>+</sup> | 0.0013               |
| 1604.6395     | <sup>293</sup> NLT <sup>295</sup> | <sup>292</sup> N | HexNAc <sub>3</sub> Hex <sub>4</sub> | [M+H] <sup>+</sup>  | 0.0001               |
| 1624.6205     | <sup>293</sup> NL <sup>294</sup>  | <sup>292</sup> N | HexNAc <sub>2</sub> Hex <sub>6</sub> | [M+H] <sup>+</sup>  | 0.0007               |
| 1626.6215     | <sup>293</sup> NLT <sup>295</sup> | <sup>292</sup> N | HexNAc <sub>3</sub> Hex <sub>4</sub> | [M+Na] <sup>+</sup> | 0.0049               |
| 1646.6064     | <sup>293</sup> NL <sup>294</sup>  | <sup>292</sup> N | HexNAc <sub>2</sub> Hex <sub>6</sub> | [M+Na] <sup>+</sup> | 0.0026               |
| 1665.6471     | <sup>293</sup> NL <sup>294</sup>  | <sup>292</sup> N | HexNAc <sub>3</sub> Hex <sub>5</sub> | [M+H] <sup>+</sup>  | 0.0015               |
| 1687.6284     | <sup>293</sup> NL <sup>294</sup>  | <sup>292</sup> N | HexNAc <sub>3</sub> Hex <sub>5</sub> | [M+Na] <sup>+</sup> | 0.0029               |
| 1725.6650     | <sup>293</sup> NLT <sup>295</sup> | <sup>292</sup> N | HexNAc <sub>2</sub> Hex <sub>6</sub> | [M+H] <sup>+</sup>  | 0.0027               |
| 1747.6476     | <sup>293</sup> NLT <sup>295</sup> | <sup>292</sup> N | HexNAc <sub>2</sub> Hex <sub>6</sub> | [M+Na] <sup>+</sup> | 0.0013               |
| 1766.6908     | <sup>293</sup> NLT <sup>295</sup> | <sup>292</sup> N | HexNAc <sub>3</sub> Hex <sub>5</sub> | [M+H] <sup>+</sup>  | 0.0013               |
| 1788.6740     | <sup>293</sup> NLT <sup>295</sup> | <sup>292</sup> N | HexNAc <sub>3</sub> Hex <sub>5</sub> | [M+Na] <sup>+</sup> | 0.0024               |
| 1807.7187     | <sup>293</sup> NLT <sup>295</sup> | <sup>292</sup> N | HexNAc <sub>4</sub> Hex <sub>4</sub> | [M+H] <sup>+</sup>  | 0.0011               |
| 1829.7006     | <sup>293</sup> NLT <sup>295</sup> | <sup>292</sup> N | HexNAc <sub>4</sub> Hex <sub>4</sub> | [M+Na] <sup>+</sup> | 0.0009               |
| 1868.7284     | <sup>293</sup> NL <sup>294</sup>  | <sup>292</sup> N | HexNAc <sub>4</sub> Hex <sub>5</sub> | [M+H] <sup>+</sup>  | 0.0019               |
| 1890.7068     | <sup>293</sup> NL <sup>294</sup>  | <sup>292</sup> N | HexNAc <sub>4</sub> Hex <sub>5</sub> | [M+Na] <sup>+</sup> | 0.0016               |
| 1969.7709     | <sup>293</sup> NLT <sup>295</sup> | <sup>292</sup> N | HexNAc <sub>4</sub> Hex <sub>5</sub> | [M+H] <sup>+</sup>  | 0.0038               |
| 1991.7547     | <sup>293</sup> NLT <sup>295</sup> | <sup>292</sup> N | HexNAc <sub>4</sub> Hex <sub>5</sub> | [M+Na] <sup>+</sup> | 0.0033               |
| 2010.7942     | <sup>293</sup> NLT <sup>295</sup> | <sup>292</sup> N | HexNAc <sub>5</sub> Hex <sub>4</sub> | [M+H] <sup>+</sup>  | 0.0008               |
| 2032.7803     | <sup>293</sup> NLT <sup>295</sup> | <sup>292</sup> N | HexNAc <sub>5</sub> Hex <sub>4</sub> | [M+Na] <sup>+</sup> | 0.0050               |
| 2172.8624     | <sup>293</sup> NLT <sup>295</sup> | <sup>292</sup> N | HexNAc <sub>5</sub> Hex <sub>5</sub> | [M+H] <sup>+</sup>  | 0.0122               |
| 2194.8402     | <sup>293</sup> NLT <sup>295</sup> | <sup>292</sup> N | HexNAc <sub>5</sub> Hex <sub>5</sub> | [M+Na] <sup>+</sup> | 0.0075               |

**Supplementary Table 2.** N-linked glycopeptides derived from immobilized pronase digestion of HAT. The RMS mass error of the assignments was 4.6 ppm. \*HexNAc: N-acetylhexosamine; Hex: hexose; NeuAc: N-acetylneuraminic acid. †All mass errors are absolute values (*i.e.*, represented as non-negative).

| GP <i>m/z</i> | Peptide                              | Site                                 | Glycan*                                                 | Ion Type               | $\Delta m/z^\dagger$ |
|---------------|--------------------------------------|--------------------------------------|---------------------------------------------------------|------------------------|----------------------|
| 1680.6334     | <sup>629</sup> SN <sup>630</sup>     | <sup>630</sup> N                     | HexNAc <sub>4</sub> Hex <sub>4</sub>                    | [M+H] <sup>+</sup>     | 0.0118               |
| 1702.6147     | <sup>629</sup> SN <sup>630</sup>     | <sup>630</sup> N                     | HexNAc <sub>4</sub> Hex <sub>4</sub>                    | [M+Na] <sup>+</sup>    | 0.0112               |
| 1721.6953     | <sup>432</sup> NK <sup>433</sup>     | <sup>432</sup> N                     | HexNAc <sub>4</sub> Hex <sub>4</sub>                    | [M+H] <sup>+</sup>     | 0.0108               |
| 1743.6711     | <sup>432</sup> NK <sup>433</sup>     | <sup>432</sup> N                     | HexNAc <sub>4</sub> Hex <sub>4</sub>                    | [M+Na] <sup>+</sup>    | 0.0047               |
| 1777.6276     | <sup>432</sup> N or <sup>630</sup> N | <sup>432</sup> N or <sup>630</sup> N | HexNAc <sub>4</sub> Hex <sub>5</sub>                    | [M+Na] <sup>+</sup>    | 0.0033               |
| 1842.6846     | <sup>629</sup> SN <sup>630</sup>     | <sup>630</sup> N                     | HexNAc <sub>4</sub> Hex <sub>5</sub>                    | [M+H] <sup>+</sup>     | 0.0102               |
| 1864.6545     | <sup>629</sup> SN <sup>630</sup>     | <sup>630</sup> N                     | HexNAc <sub>4</sub> Hex <sub>5</sub>                    | [M+Na] <sup>+</sup>    | 0.0018               |
| 1876.7006     | <sup>630</sup> NV <sup>631</sup>     | <sup>630</sup> N                     | HexNAc <sub>4</sub> Hex <sub>5</sub>                    | [M+Na] <sup>+</sup>    | 0.0079               |
| 1883.7271     | <sup>432</sup> NK <sup>433</sup>     | <sup>432</sup> N                     | HexNAc <sub>4</sub> Hex <sub>5</sub>                    | [M+H] <sup>+</sup>     | 0.0102               |
| 1905.7168     | <sup>432</sup> NK <sup>433</sup>     | <sup>432</sup> N                     | HexNAc <sub>4</sub> Hex <sub>5</sub>                    | [M+Na] <sup>+</sup>    | 0.0025               |
| 1921.6847     | <sup>628</sup> GSN <sup>630</sup>    | <sup>630</sup> N                     | HexNAc <sub>4</sub> Hex <sub>5</sub>                    | [M+Na] <sup>+</sup>    | 0.0069               |
| 1927.6949     | <sup>432</sup> NK <sup>433</sup>     | <sup>432</sup> N                     | HexNAc <sub>4</sub> Hex <sub>5</sub>                    | [M-H+2Na] <sup>+</sup> | 0.0063               |
| 2068.7150     | <sup>432</sup> N or <sup>630</sup> N | <sup>432</sup> N or <sup>630</sup> N | HexNAc <sub>4</sub> Hex <sub>5</sub> NeuAc <sub>1</sub> | [M+Na] <sup>+</sup>    | 0.0047               |
| 2090.7025     | <sup>432</sup> N or <sup>630</sup> N | <sup>432</sup> N or <sup>630</sup> N | HexNAc <sub>4</sub> Hex <sub>5</sub> NeuAc <sub>1</sub> | [M-H+2Na] <sup>+</sup> | 0.0009               |
| 2133.7746     | <sup>629</sup> SN <sup>630</sup>     | <sup>630</sup> N                     | HexNAc <sub>4</sub> Hex <sub>5</sub> NeuAc <sub>1</sub> | [M+H] <sup>+</sup>     | 0.0048               |
| 2155.7493     | <sup>629</sup> SN <sup>630</sup>     | <sup>630</sup> N                     | HexNAc <sub>4</sub> Hex <sub>5</sub> NeuAc <sub>1</sub> | [M+Na] <sup>+</sup>    | 0.0025               |
| 2167.7854     | <sup>630</sup> NV <sup>631</sup>     | <sup>630</sup> N                     | HexNAc <sub>4</sub> Hex <sub>5</sub> NeuAc <sub>1</sub> | [M+Na] <sup>+</sup>    | 0.0027               |
| 2174.8295     | <sup>432</sup> NK <sup>433</sup>     | <sup>432</sup> N                     | HexNAc <sub>4</sub> Hex <sub>5</sub> NeuAc <sub>1</sub> | [M+H] <sup>+</sup>     | 0.0032               |
| 2177.7042     | <sup>629</sup> SN <sup>630</sup>     | <sup>630</sup> N                     | HexNAc <sub>4</sub> Hex <sub>5</sub> NeuAc <sub>1</sub> | [M-H+2Na] <sup>+</sup> | 0.0294               |
| 2189.7620     | <sup>630</sup> NV <sup>631</sup>     | <sup>630</sup> N                     | HexNAc <sub>4</sub> Hex <sub>5</sub> NeuAc <sub>1</sub> | [M-H+2Na] <sup>+</sup> | 0.0080               |
| 2196.8188     | <sup>432</sup> NK <sup>433</sup>     | <sup>432</sup> N                     | HexNAc <sub>4</sub> Hex <sub>5</sub> NeuAc <sub>1</sub> | [M+Na] <sup>+</sup>    | 0.0041               |
| 2212.7812     | <sup>628</sup> GSN <sup>630</sup>    | <sup>630</sup> N                     | HexNAc <sub>4</sub> Hex <sub>5</sub> NeuAc <sub>1</sub> | [M+Na] <sup>+</sup>    | 0.0080               |
| 2218.7943     | <sup>432</sup> NK <sup>433</sup>     | <sup>432</sup> N                     | HexNAc <sub>4</sub> Hex <sub>5</sub> NeuAc <sub>1</sub> | [M-H+2Na] <sup>+</sup> | 0.0023               |
| 2234.7563     | <sup>628</sup> GSN <sup>630</sup>    | <sup>630</sup> N                     | HexNAc <sub>4</sub> Hex <sub>5</sub> NeuAc <sub>1</sub> | [M-H+2Na] <sup>+</sup> | 0.0012               |
| 2359.7959     | <sup>432</sup> N or <sup>630</sup> N | <sup>432</sup> N or <sup>630</sup> N | HexNAc <sub>4</sub> Hex <sub>5</sub> NeuAc <sub>2</sub> | [M+Na] <sup>+</sup>    | 0.0192               |
| 2424.8563     | <sup>629</sup> SN <sup>630</sup>     | <sup>630</sup> N                     | HexNAc <sub>4</sub> Hex <sub>5</sub> NeuAc <sub>2</sub> | [M+H] <sup>+</sup>     | 0.0089               |
| 2446.8393     | <sup>629</sup> SN <sup>630</sup>     | <sup>630</sup> N                     | HexNAc <sub>4</sub> Hex <sub>5</sub> NeuAc <sub>2</sub> | [M+Na] <sup>+</sup>    | 0.0078               |
| 2465.9176     | <sup>432</sup> NK <sup>433</sup>     | <sup>432</sup> N                     | HexNAc <sub>4</sub> Hex <sub>5</sub> NeuAc <sub>2</sub> | [M+H] <sup>+</sup>     | 0.0105               |
| 2487.9121     | <sup>432</sup> NK <sup>433</sup>     | <sup>432</sup> N                     | HexNAc <sub>4</sub> Hex <sub>5</sub> NeuAc <sub>2</sub> | [M+Na] <sup>+</sup>    | 0.0021               |
| 2525.8304     | <sup>628</sup> GSN <sup>630</sup>    | <sup>630</sup> N                     | HexNAc <sub>4</sub> Hex <sub>5</sub> NeuAc <sub>2</sub> | [M-H+2Na] <sup>+</sup> | 0.0201               |

**Supplementary Table 3.** N-linked and O-linked glycopeptides derived from immobilized pronase digestion of BF. The RMS mass error of the assignments was 3.2 ppm.

†Parentheses are used to indicate ambiguous assignment of terminating amino acid residues. \*HexNAc: N-acetylhexosamine; Hex: hexose; NeuAc: N-acetylneuraminic acid.

‡All mass errors are absolute values (*i.e.*, represented as non-negative).

| GP <i>m/z</i> | Peptide <sup>†</sup>                       | Site                                 | Glycan*                                                 | Ion Type                | $\Delta m/z^{\ddagger}$ |
|---------------|--------------------------------------------|--------------------------------------|---------------------------------------------------------|-------------------------|-------------------------|
| 1114.4518     | <sup>278</sup> GPTPS <sup>282</sup>        | <sup>280</sup> T or <sup>282</sup> S | HexNAc <sub>1</sub> Hex <sub>1</sub> NeuAc <sub>1</sub> | [M+H] <sup>+</sup>      | 0.0004                  |
| 1136.4339     | <sup>278</sup> GPTPS <sup>282</sup>        | <sup>280</sup> T or <sup>282</sup> S | HexNAc <sub>1</sub> Hex <sub>1</sub> NeuAc <sub>1</sub> | [M+Na] <sup>+</sup>     | 0.0002                  |
| 1185.4900     | <sup>277</sup> (A)GPTPS(A) <sup>283</sup>  | <sup>280</sup> T or <sup>282</sup> S | HexNAc <sub>1</sub> Hex <sub>1</sub> NeuAc <sub>1</sub> | [M+H] <sup>+</sup>      | 0.0008                  |
| 1280.4387     | <sup>156</sup> NDS <sup>158</sup>          | <sup>156</sup> N                     | HexNAc <sub>4</sub> Hex <sub>5</sub> NeuAc <sub>2</sub> | [M+Na+H] <sup>2+</sup>  | 0.0053                  |
| 1291.4247     | <sup>156</sup> NDS <sup>158</sup>          | <sup>156</sup> N                     | HexNAc <sub>4</sub> Hex <sub>5</sub> NeuAc <sub>2</sub> | [M+2Na] <sup>2+</sup>   | 0.0008                  |
| 1312.5526     | <sup>269</sup> (A)PSAVPD(A) <sup>276</sup> | <sup>271</sup> S                     | HexNAc <sub>1</sub> Hex <sub>1</sub> NeuAc <sub>1</sub> | [M+H] <sup>+</sup>      | 0.0001                  |
| 1334.5359     | <sup>269</sup> (A)PSAVPD(A) <sup>276</sup> | <sup>271</sup> S                     | HexNAc <sub>1</sub> Hex <sub>1</sub> NeuAc <sub>1</sub> | [M+Na] <sup>+</sup>     | 0.0014                  |
| 1388.5667     | <sup>277</sup> (A)GPTPS(A) <sup>283</sup>  | <sup>280</sup> T or <sup>282</sup> S | HexNAc <sub>2</sub> Hex <sub>1</sub> NeuAc <sub>1</sub> | [M+H] <sup>+</sup>      | 0.0019                  |
| 1405.5458     | <sup>278</sup> GPTPS <sup>282</sup>        | <sup>280</sup> T or <sup>282</sup> S | HexNAc <sub>1</sub> Hex <sub>1</sub> NeuAc <sub>2</sub> | [M+H] <sup>+</sup>      | 0.0017                  |
| 1463.0001     | <sup>156</sup> NDS <sup>158</sup>          | <sup>156</sup> N                     | HexNAc <sub>5</sub> Hex <sub>6</sub> NeuAc <sub>2</sub> | [M+Na+H] <sup>2+</sup>  | 0.0006                  |
| 1473.9844     | <sup>156</sup> NDS <sup>158</sup>          | <sup>156</sup> N                     | HexNAc <sub>5</sub> Hex <sub>6</sub> NeuAc <sub>2</sub> | [M+2Na] <sup>2+</sup>   | 0.0060                  |
| 1550.6179     | <sup>277</sup> (A)GPTPS(A) <sup>283</sup>  | <sup>280</sup> T or <sup>282</sup> S | HexNAc <sub>2</sub> Hex <sub>2</sub> NeuAc <sub>1</sub> | [M+H] <sup>+</sup>      | 0.0036                  |
| 1591.5374     | <sup>99</sup> NCS <sup>101</sup>           | <sup>99</sup> N                      | HexNAc <sub>5</sub> Hex <sub>6</sub> NeuAc <sub>3</sub> | [M+2H] <sup>2+</sup>    | 0.0080                  |
| 1597.5662     | <sup>156</sup> NDS <sup>158</sup>          | <sup>156</sup> N                     | HexNAc <sub>5</sub> Hex <sub>6</sub> NeuAc <sub>3</sub> | [M+2H] <sup>2+</sup>    | 0.0100                  |
| 1603.6419     | <sup>269</sup> (A)PSAVPD(A) <sup>276</sup> | <sup>271</sup> S                     | HexNAc <sub>1</sub> Hex <sub>1</sub> NeuAc <sub>2</sub> | [M+H] <sup>+</sup>      | 0.0060                  |
| 1608.5495     | <sup>156</sup> NDS <sup>158</sup>          | <sup>156</sup> N                     | HexNAc <sub>5</sub> Hex <sub>6</sub> NeuAc <sub>3</sub> | [M+Na+H] <sup>2+</sup>  | 0.0023                  |
| 1619.5393     | <sup>156</sup> NDS <sup>158</sup>          | <sup>156</sup> N                     | HexNAc <sub>5</sub> Hex <sub>6</sub> NeuAc <sub>3</sub> | [M+2Na] <sup>2+</sup>   | 0.0012                  |
| 1625.6274     | <sup>269</sup> (A)PSAVPD(A) <sup>276</sup> | <sup>271</sup> S                     | HexNAc <sub>1</sub> Hex <sub>1</sub> NeuAc <sub>2</sub> | [M+Na] <sup>+</sup>     | 0.0025                  |
| 1630.5211     | <sup>156</sup> NDS <sup>158</sup>          | <sup>156</sup> N                     | HexNAc <sub>5</sub> Hex <sub>6</sub> NeuAc <sub>3</sub> | [M+3Na-H] <sup>2+</sup> | 0.0080                  |
| 1737.1004     | <sup>99</sup> NCS <sup>101</sup>           | <sup>99</sup> N                      | HexNAc <sub>5</sub> Hex <sub>6</sub> NeuAc <sub>4</sub> | [M+2H] <sup>2+</sup>    | 0.0053                  |
| 1754.1062     | <sup>156</sup> NDS <sup>158</sup>          | <sup>156</sup> N                     | HexNAc <sub>5</sub> Hex <sub>6</sub> NeuAc <sub>4</sub> | [M+Na+H] <sup>2+</sup>  | 0.0113                  |
| 1765.0970     | <sup>156</sup> NDS <sup>158</sup>          | <sup>156</sup> N                     | HexNAc <sub>5</sub> Hex <sub>6</sub> NeuAc <sub>4</sub> | [M+2Na] <sup>2+</sup>   | 0.0112                  |
| 1841.7190     | <sup>277</sup> (A)GPTPS(A) <sup>283</sup>  | <sup>280</sup> T or <sup>282</sup> S | HexNAc <sub>2</sub> Hex <sub>2</sub> NeuAc <sub>2</sub> | [M+H] <sup>+</sup>      | 0.0022                  |
| 1863.7017     | <sup>277</sup> (A)GPTPS(A) <sup>283</sup>  | <sup>280</sup> T or <sup>282</sup> S | HexNAc <sub>2</sub> Hex <sub>2</sub> NeuAc <sub>2</sub> | [M+Na] <sup>+</sup>     | 0.0030                  |
| 2539.9022     | <sup>156</sup> NDS <sup>158</sup>          | <sup>156</sup> N                     | HexNAc <sub>4</sub> Hex <sub>5</sub> NeuAc <sub>2</sub> | [M+H] <sup>+</sup>      | 0.0001                  |
| 2561.8847     | <sup>156</sup> NDS <sup>158</sup>          | <sup>156</sup> N                     | HexNAc <sub>4</sub> Hex <sub>5</sub> NeuAc <sub>2</sub> | [M+Na] <sup>+</sup>     | 0.0107                  |

**Supplementary Table 4.** N-linked and O-linked glycopeptides derived from immobilized pronase digestion of a mixture of RNase B,  $\kappa$ -CN, BF, and the nonglycosylated protein BSA. The RMS mass error of the assignments was 3.0 ppm. <sup>†\*</sup>See caption to Supplementary Table 3.

| Source       | GP <i>m/z</i> | Peptide <sup>†</sup>                       | Site             | Glycan*                                                 | Ion Type               | $\Delta m/z^{\dagger}$ |
|--------------|---------------|--------------------------------------------|------------------|---------------------------------------------------------|------------------------|------------------------|
| $\kappa$ -CN | 1312.5545     | <sup>182</sup> (T)VQVTS(T) <sup>188</sup>  | <sup>186</sup> T | HexNAc <sub>1</sub> Hex <sub>1</sub> NeuAc <sub>1</sub> | [M+Na] <sup>+</sup>    | 0.0043                 |
| BF           | 1312.5545     | <sup>269</sup> (A)PSAVPD(A) <sup>276</sup> | <sup>271</sup> S | HexNAc <sub>1</sub> Hex <sub>1</sub> NeuAc <sub>1</sub> | [M+H] <sup>+</sup>     | 0.0019                 |
| $\kappa$ -CN | 1334.5389     | <sup>182</sup> (T)VQVTS(T) <sup>188</sup>  | <sup>186</sup> T | HexNAc <sub>1</sub> Hex <sub>1</sub> NeuAc <sub>1</sub> | [M-H+2Na] <sup>+</sup> | 0.0068                 |
| BF           | 1334.5389     | <sup>269</sup> (A)PSAVPD(A) <sup>276</sup> | <sup>271</sup> S | HexNAc <sub>1</sub> Hex <sub>1</sub> NeuAc <sub>1</sub> | [M+Na] <sup>+</sup>    | 0.0044                 |
| RNase B      | 1349.4875     | <sup>60</sup> N                            | <sup>60</sup> N  | HexNAc <sub>2</sub> Hex <sub>5</sub>                    | [M+H] <sup>+</sup>     | 0.0039                 |
| RNase B      | 1371.4683     | <sup>60</sup> N                            | <sup>60</sup> N  | HexNAc <sub>2</sub> Hex <sub>5</sub>                    | [M+Na] <sup>+</sup>    | 0.0028                 |
| RNase B      | 1462.5684     | <sup>60</sup> NL <sup>61</sup>             | <sup>60</sup> N  | HexNAc <sub>2</sub> Hex <sub>5</sub>                    | [M+H] <sup>+</sup>     | 0.0007                 |
| RNase B      | 1484.5548     | <sup>60</sup> NL <sup>61</sup>             | <sup>60</sup> N  | HexNAc <sub>2</sub> Hex <sub>5</sub>                    | [M+Na] <sup>+</sup>    | 0.0053                 |
| RNase B      | 1505.5855     | <sup>59</sup> RN <sup>60</sup>             | <sup>60</sup> N  | HexNAc <sub>2</sub> Hex <sub>5</sub>                    | [M+H] <sup>+</sup>     | 0.0008                 |
| RNase B      | 1511.5354     | <sup>60</sup> N                            | <sup>60</sup> N  | HexNAc <sub>2</sub> Hex <sub>6</sub>                    | [M+H] <sup>+</sup>     | 0.0010                 |
| RNase B      | 1527.5670     | <sup>59</sup> RN <sup>60</sup>             | <sup>60</sup> N  | HexNAc <sub>2</sub> Hex <sub>5</sub>                    | [M+Na] <sup>+</sup>    | 0.0004                 |
| RNase B      | 1533.5210     | <sup>60</sup> N                            | <sup>60</sup> N  | HexNAc <sub>2</sub> Hex <sub>6</sub>                    | [M+Na] <sup>+</sup>    | 0.0027                 |
| $\kappa$ -CN | 1603.6481     | <sup>182</sup> (T)VQVTS(T) <sup>188</sup>  | <sup>186</sup> T | HexNAc <sub>1</sub> Hex <sub>1</sub> NeuAc <sub>2</sub> | [M+Na] <sup>+</sup>    | 0.0025                 |
| BF           | 1603.6481     | <sup>269</sup> (A)PSAVPD(A) <sup>276</sup> | <sup>271</sup> S | HexNAc <sub>1</sub> Hex <sub>1</sub> NeuAc <sub>2</sub> | [M+H] <sup>+</sup>     | 0.0001                 |
| RNase B      | 1624.6180     | <sup>60</sup> NL <sup>61</sup>             | <sup>60</sup> N  | HexNAc <sub>2</sub> Hex <sub>6</sub>                    | [M+H] <sup>+</sup>     | 0.0024                 |
| RNase B      | 1646.6041     | <sup>60</sup> NL <sup>61</sup>             | <sup>60</sup> N  | HexNAc <sub>2</sub> Hex <sub>6</sub>                    | [M+Na] <sup>+</sup>    | 0.0017                 |
| RNase B      | 1667.6400     | <sup>59</sup> RN <sup>60</sup>             | <sup>60</sup> N  | HexNAc <sub>2</sub> Hex <sub>6</sub>                    | [M+H] <sup>+</sup>     | 0.0025                 |
| RNase B      | 1673.5883     | <sup>60</sup> N                            | <sup>60</sup> N  | HexNAc <sub>2</sub> Hex <sub>7</sub>                    | [M+H] <sup>+</sup>     | 0.0009                 |
| RNase B      | 1689.6057     | <sup>59</sup> RN <sup>60</sup>             | <sup>60</sup> N  | HexNAc <sub>2</sub> Hex <sub>6</sub>                    | [M+Na] <sup>+</sup>    | 0.0137                 |
| RNase B      | 1695.5737     | <sup>60</sup> N                            | <sup>60</sup> N  | HexNAc <sub>2</sub> Hex <sub>7</sub>                    | [M+Na] <sup>+</sup>    | 0.0026                 |
| BF           | 1739.1566     | <sup>153</sup> APLNDS <sup>158</sup>       | <sup>156</sup> N | HexNAc <sub>5</sub> Hex <sub>6</sub> NeuAc <sub>3</sub> | [M+2H] <sup>+2</sup>   | 0.0061                 |
| BF           | 1750.1479     | <sup>153</sup> APLNDS <sup>158</sup>       | <sup>156</sup> N | HexNAc <sub>5</sub> Hex <sub>6</sub> NeuAc <sub>3</sub> | [M+H+Na] <sup>+2</sup> | 0.0065                 |
| RNase B      | 1786.6767     | <sup>60</sup> NL <sup>61</sup>             | <sup>60</sup> N  | HexNAc <sub>2</sub> Hex <sub>7</sub>                    | [M+H] <sup>+</sup>     | 0.0034                 |
| RNase B      | 1808.6496     | <sup>60</sup> NL <sup>61</sup>             | <sup>60</sup> N  | HexNAc <sub>2</sub> Hex <sub>7</sub>                    | [M+Na] <sup>+</sup>    | 0.0056                 |
| RNase B      | 1829.6918     | <sup>59</sup> RN <sup>60</sup>             | <sup>60</sup> N  | HexNAc <sub>2</sub> Hex <sub>7</sub>                    | [M+H] <sup>+</sup>     | 0.0015                 |
| RNase B      | 1835.6380     | <sup>60</sup> N                            | <sup>60</sup> N  | HexNAc <sub>2</sub> Hex <sub>8</sub>                    | [M+H] <sup>+</sup>     | 0.0040                 |
| BF           | 1895.6805     | <sup>153</sup> APLNDS <sup>158</sup>       | <sup>156</sup> N | HexNAc <sub>5</sub> Hex <sub>6</sub> NeuAc <sub>4</sub> | [M+H+Na] <sup>+2</sup> | 0.0086                 |
| RNase B      | 1948.7255     | <sup>60</sup> NL <sup>61</sup>             | <sup>60</sup> N  | HexNAc <sub>2</sub> Hex <sub>8</sub>                    | [M+H] <sup>+</sup>     | 0.0006                 |
| RNase B      | 1970.7082     | <sup>60</sup> NL <sup>61</sup>             | <sup>60</sup> N  | HexNAc <sub>2</sub> Hex <sub>8</sub>                    | [M+Na] <sup>+</sup>    | 0.0003                 |
| RNase B      | 1991.7420     | <sup>59</sup> RN <sup>60</sup>             | <sup>60</sup> N  | HexNAc <sub>2</sub> Hex <sub>8</sub>                    | [M+H] <sup>+</sup>     | 0.0011                 |
| RNase B      | 2110.7758     | <sup>60</sup> NL <sup>61</sup>             | <sup>60</sup> N  | HexNAc <sub>2</sub> Hex <sub>9</sub>                    | [M+H] <sup>+</sup>     | 0.0031                 |
| RNase B      | 2132.7605     | <sup>60</sup> NL <sup>61</sup>             | <sup>60</sup> N  | HexNAc <sub>2</sub> Hex <sub>9</sub>                    | [M+Na] <sup>+</sup>    | 0.0003                 |
| RNase B      | 2153.7781     | <sup>59</sup> RN <sup>60</sup>             | <sup>60</sup> N  | HexNAc <sub>2</sub> Hex <sub>9</sub>                    | [M+H] <sup>+</sup>     | 0.0178                 |
| BF           | 2821.0821     | <sup>153</sup> APLNDS <sup>158</sup>       | <sup>156</sup> N | HexNAc <sub>4</sub> Hex <sub>5</sub> NeuAc <sub>2</sub> | [M+H] <sup>+</sup>     | 0.0160                 |
